# Supplementary material for: Using Phylogenetic, Functional and Trait Diversity to Understand Patterns of Plant Community Productivity
Source: PLoS One. 2009 May 27;4(5):e5695. doi: 10.1371/journal.pone.0005695 (PMC2682649; doi:10.1371/journal.pone.0005695)
Supplement: Table S1 — Multiple model comparison. (0.06 MB DOC) [file pone.0005695.s003.doc]

**Table S1:** Comparison of multivariate predictor models. The best model is highlighted in bold.

| Model | DF | AIC | R2 | AW |
| --- | --- | --- | --- | --- |
| *Prod* = *0* + *1PD* | 149 | 1752.78 | 0.415 | 3.54E-17 |
| *Prod* = *0* + *1Nfix* | 149 | 1747.47 | 0.436 | 5.03E-16 |
| *Prod* = *0* + *1PD* + *2Log(N)* + *12PD Log(N)* | 147 | 1747.73 | 0.449 | 4.40E-16 |
| *Prod* = *0* + *1PD* + *2 Log(N)* | 148 | 1750.44 | 0.432 | 1.14E-16 |
| *Prod* = *0* + *1PD* + *2MDS* + *12PDMDS* | 147 | 1751.71 | 0.435 | 6.01E-17 |
| *Prod* = *0* + *1PD* + *2MDS* | 148 | 1750.97 | 0.430 | 8.72E-17 |
| *Prod* = *0* + *1PD* + *2 Log(N)* + *3MDS* + *12PD Log(N)* + *13PD* *MDS* + *23 Log(N)MDS* | 144 | 1750.37 | 0.461 | 1.18E-16 |
| *Prod* = *0* + *1PD* + *2 Log(N)* + *3MDS* | 147 | 1751.85 | 0.434 | 5.62E-17 |
| *Prod* = *0* + *1PD* + *2FD* + *12PDFD* | 147 | 1746.93 | 0.452 | 6.57E-16 |
| *Prod* = *0* + *1PD* + *2FD* | 148 | 1744.93 | 0.452 | 1.78E-15 |
| *Prod* = *0* + *1PD* + *2 Log(N)* + *3FD* + *12PD Log(N)* + *13PD* *FD* + *23 Log(N)FD* | 144 | 1746.77 | 0.474 | 7.11E-16 |
| *Prod* = *0* + *1PD* + *2 Log(N)* + *3FD* | 147 | 1746.58 | 0.454 | 7.84E-16 |
| *Prod* = *0* + *1Nfix* + *2 Log(N)* + *12Nfix Log(N)* | 147 | 1728.51 | 0.515 | 6.58E-12 |
| *Prod* = *0* + *1Nfix* + *2 Log(N)* | 148 | 1726.56 | 0.515 | 1.74E-11 |
| *Prod* = *0* + *1Nfix* + *2MDS* + *12NfixMDS* | 147 | 1729.52 | 0.512 | 3.96E-12 |
| *Prod* = *0* + *1Nfix* + *2MDS* | 148 | 1727.53 | 0.512 | 1.07E-11 |
| *Prod* = *0* + *1PD* + *2 Log(N)* + *3Nfix* + *12PD Log(N)* + *13PD* *Nfix* + *23 Log(N)Nfix* | 144 | 1726.67 | 0.540 | 1.65E-11 |
| *Prod* = *0* + *1PD* + *2 Log(N)* + *3Nfix* | 147 | 1722.73 | 0.533 | 1.18E-10 |
| *Prod* = *0* + *1PD* + *2Nfix* + *12PDNfix* | 147 | 1724.18 | 0.529 | 5.71E-11 |
| *Prod* = *0* + *1PD* + *2 Log(N)* + *3Nfix* | 148 | 1722.19 | 0.529 | 1.55E-10 |
| ***Prod* = *0* + *1PD* + *2SW2* + *3Nfix* + *12PDSW2* + *13PD* *Nfix* + *23SW2Nfix*** | **144** | **1677.02** | **0.669** | **9.99E-01** |
| *Prod* = *0* + *1PD* + *2SW* + *3Nfix* | 147 | 1690.79 | 0.622 | 1.02E-03 |
| *Prod* = *0* + *1PD* + *2H* + *3Nfix* + *12PDH* + *13PD* *Nfix* + *23HNfix* | 144 | 1724.39 | 0.547 | 5.16E-11 |
| *Prod* = *0* + *1PD* + *2H* + *3Nfix* | 147 | 1723.30 | 0.532 | 8.88E-11 |
| *Prod* = *0* + *1PD* + *2H* + *3Nfix* + *4SW2* + *12PDH* + *13PD* *Nfix* + *14PDSW2* + *23HNfix* + *24HSW2* + *34NfixSW2* | 140 | 1723.30 | 0.690 | 8.88E-11 |
| *Prod* = *0* + *1PD* + *2H* + *3Nfix + 3SW* | 146 | 1692.74 | 0.622 | 3.85E-04 |
